# Supplementary material for: Nylon 6,6 Nonwoven Fabric Separates Oil Contaminates from Oil-in-Water Emulsions
Source: PLoS One. 2016 Jul 13;11(7):e0158493. doi: 10.1371/journal.pone.0158493 (PMC4943659; doi:10.1371/journal.pone.0158493)
Supplement: S2 Dataset — (XLS) [file pone.0158493.s002.xls]

## Sheet: Thickness vs weight
Type	L(in)	W(in)	Thickness (in)	L (Yds)	W (yds)	sq yds	sq meters	weight(g)	Weight (oz)	Bas wt (osy)	wt w/oil	Density
30300	3	3	0.0175	0.0833333	0.0833333	0.00694444	0.00580644	0.579	0.0204188	2.9403	2.2956	0.224282
30030	3	3	0.0045	0.0833333	0.0833333	0.00694444	0.00580644	0.0719	0.0025356	0.365126	0.8476	0.10831
30150	3	3	0.012	0.0833333	0.0833333	0.00694444	0.00580644	0.301	0.0106149	1.52855	1.8808	0.170035
30040	3	3	0.0051	0.0833333	0.0833333	0.00694444	0.00580644	0.0706	0.00248975	0.358524	1.2191	0.0938399
30200	3	3	0.0156	0.0833333	0.0833333	0.00694444	0.00580644	0.4256	0.015009	2.1613	2.3027	0.18494
30100	3	3	0.008	0.0833333	0.0833333	0.00694444	0.00580644	0.1738	0.00612916	0.882599	1.4242	0.147269
30085	3	3	0.0077	0.0833333	0.0833333	0.00694444	0.00580644	0.1732	0.006108	0.879552	1.5086	0.152479
30240	3	3	0.016	0.0833333	0.0833333	0.00694444	0.00580644	0.5172	0.0182394	2.62647	2.186	0.219125
30050	3	3	0.0062	0.0833333	0.0833333	0.00694444	0.00580644	0.0946	0.00333613	0.480402	1.0287	0.103431
30400	3	3	0.0206	0.0833333	0.0833333	0.00694444	0.00580644	0.736	0.0259555	3.73759	2.9781	0.242194
30070	3	3	0.0066	0.0833333	0.0833333	0.00694444	0.00580644	0.1175	0.00414371	0.596694	1.4313	0.120683
30300	3	3	0.0178	0.0833333	0.0833333	0.00694444	0.00580644	0.6097	0.0215014	3.09621	2.7814	0.232193
30030	3	3	0.0046	0.0833333	0.0833333	0.00694444	0.00580644	0.0608	0.00214415	0.308757	0.9225	0.0895981
30150	3	3	0.012	0.0833333	0.0833333	0.00694444	0.00580644	0.2906	0.0102482	1.47574	1.979	0.16416
30040	3	3	0.0049	0.0833333	0.0833333	0.00694444	0.00580644	0.082	0.00289178	0.416416	1.1744	0.113441
30200	3	3	0.0148	0.0833333	0.0833333	0.00694444	0.00580644	0.3969	0.0139969	2.01556	2.3368	0.181791
30100	3	3	0.0094	0.0833333	0.0833333	0.00694444	0.00580644	0.1886	0.00665109	0.957757	1.5903	0.136009
30085	3	3	0.0083	0.0833333	0.0833333	0.00694444	0.00580644	0.1684	0.00593873	0.855177	1.5816	0.137536
30240	3	3	0.0155	0.0833333	0.0833333	0.00694444	0.00580644	0.4861	0.0171426	2.46854	2.4445	0.212592
30050	3	3	0.0062	0.0833333	0.0833333	0.00694444	0.00580644	0.0965	0.00340313	0.490051	1.1827	0.105509
30400	3	3	0.0211	0.0833333	0.0833333	0.00694444	0.00580644	0.7426	0.0261882	3.77111	3.3569	0.238575
30070	3	3	0.0082	0.0833333	0.0833333	0.00694444	0.00580644	0.1484	0.00523341	0.753612	1.4916	0.12268
30030	2	2	0.004	0.0555556	0.0555556	0.00308642	0.00258064		0	0.355		0.11847
30030	2	2	0.004	0.0555556	0.0555556	0.00308642	0.00258064		0	0.346		0.115466
30030	2	2	0.004	0.0555556	0.0555556	0.00308642	0.00258064		0	0.374		0.12481
30030	2	2	0.004	0.0555556	0.0555556	0.00308642	0.00258064		0	0.287		0.095777
30060	2	2	0.007	0.0555556	0.0555556	0.00308642	0.00258064		0	0.672		0.128148
30060	2	2	0.007	0.0555556	0.0555556	0.00308642	0.00258064		0	0.67		0.127766
30060	2	2	0.007	0.0555556	0.0555556	0.00308642	0.00258064		0	0.587		0.111938
30100	2	2	0.0093	0.0555556	0.0555556	0.00308642	0.00258064		0	0.994		0.142673
30100	2	2	0.0093	0.0555556	0.0555556	0.00308642	0.00258064		0	0.84		0.120569
30100	2	2	0.0093	0.0555556	0.0555556	0.00308642	0.00258064		0	0.976		0.14009
30150	2	2	0.0126	0.0555556	0.0555556	0.00308642	0.00258064		0	1.678		0.177771
30150	2	2	0.0126	0.0555556	0.0555556	0.00308642	0.00258064		0	1.52		0.161032
30150	2	2	0.0126	0.0555556	0.0555556	0.00308642	0.00258064		0	1.694		0.179466
30150	2	2	0.0126	0.0555556	0.0555556	0.00308642	0.00258064		0	1.808		0.191543
30200	2	2	0.0152	0.0555556	0.0555556	0.00308642	0.00258064		0	2.05		0.180032
30200	2	2	0.0152	0.0555556	0.0555556	0.00308642	0.00258064		0	2.036		0.178802
30200	2	2	0.0152	0.0555556	0.0555556	0.00308642	0.00258064		0	2.185		0.191888
30200	2	2	0.0152	0.0555556	0.0555556	0.00308642	0.00258064		0	2.148		0.188638
30100	2	2	0.0093	0.0555556	0.0555556	0.00308642	0.00258064		0	1.009		0.144826
30100	2	2	0.0093	0.0555556	0.0555556	0.00308642	0.00258064		0	1.097		0.157457
30100	2	2	0.0093	0.0555556	0.0555556	0.00308642	0.00258064		0	1.115		0.160041
				0	0	0	0		0
				0	0	0	0		0
				0	0	0	0		0
				0	0	0	0		0
				0	0	0	0		0
				0	0	0	0		0
				0	0	0	0		0
				0	0	0	0		0
				0	0	0	0		0
				0	0	0	0		0
				0	0	0	0		0
				0	0	0	0		0
				0	0	0	0		0
				0	0	0	0		0
				0	0	0	0		0
				0	0	0	0		0
